# Supplementary material
Source: PubMed Central journal article supplement (PMC5930378)
Supplement: AEM.00104-18_zam010188506s1.pdf [file AEM.00104-18_zam010188506s1.pdf]

## Resveratrol as a growth substrate for bacteria from the rhizosphere.

Zohre Kurt, Marco Minoia and Jim C. Spain\*

### Supplementary figures and tables

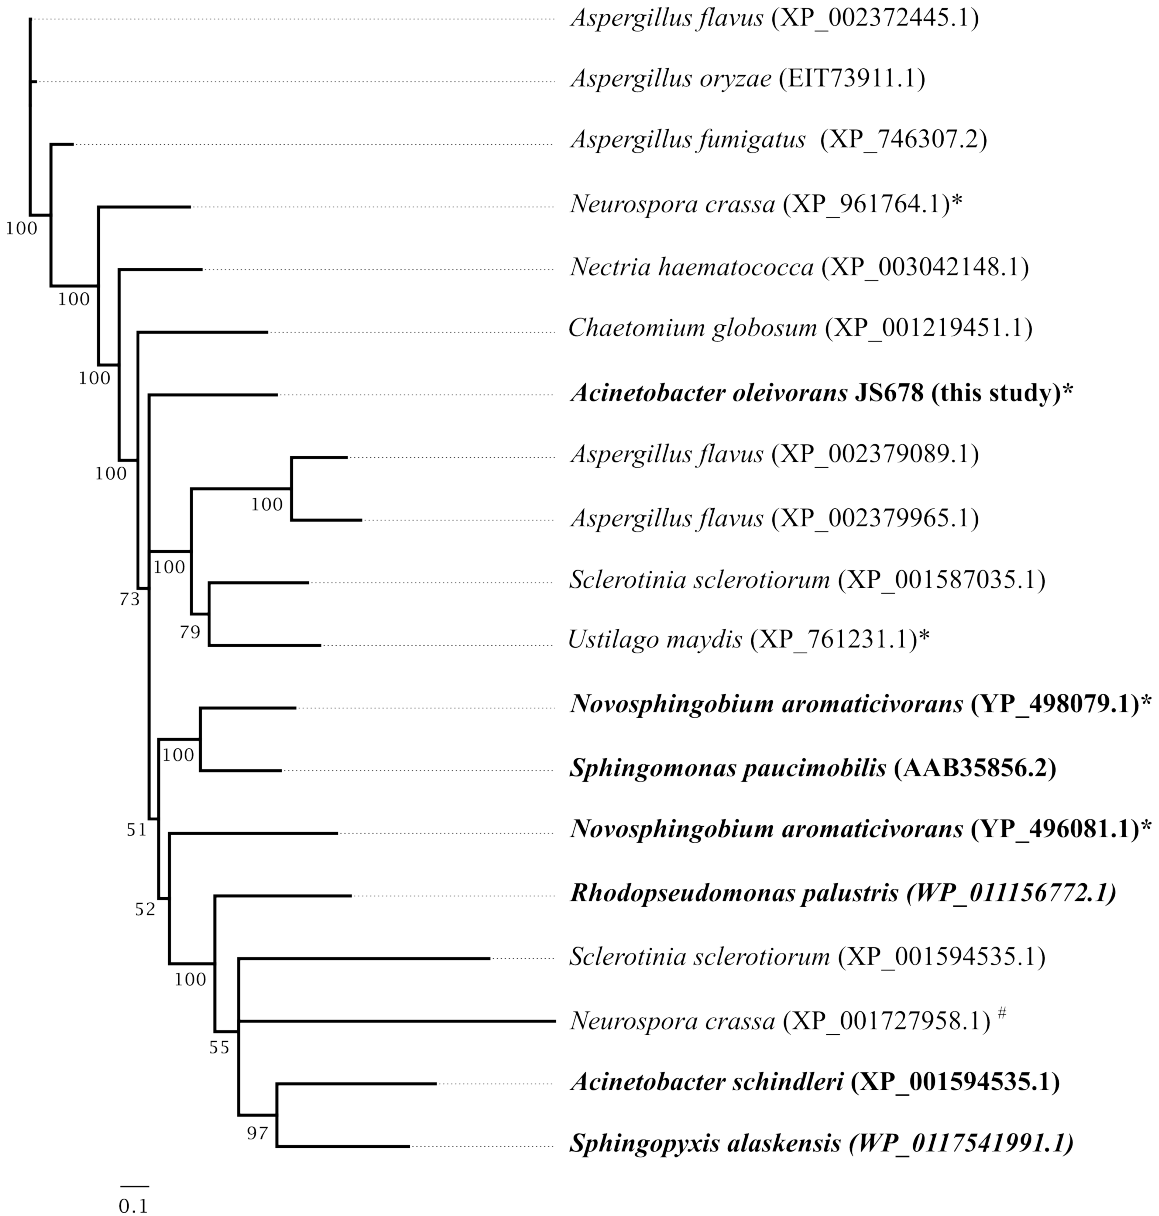

**Figure S1.** Phylogenetic tree of functionally characterized carotenoid cleaving oxygenases from fungi and bacteria (bold)(1-6). Enzymes that transform resveratrol are marked as \* and enzymes that were tested but could not transform resveratrol are marked

as #. The tree was constructed based on neighbor joining method and bootstrap values are included in nodes and the alignment for the tree was made with ClustalW2.



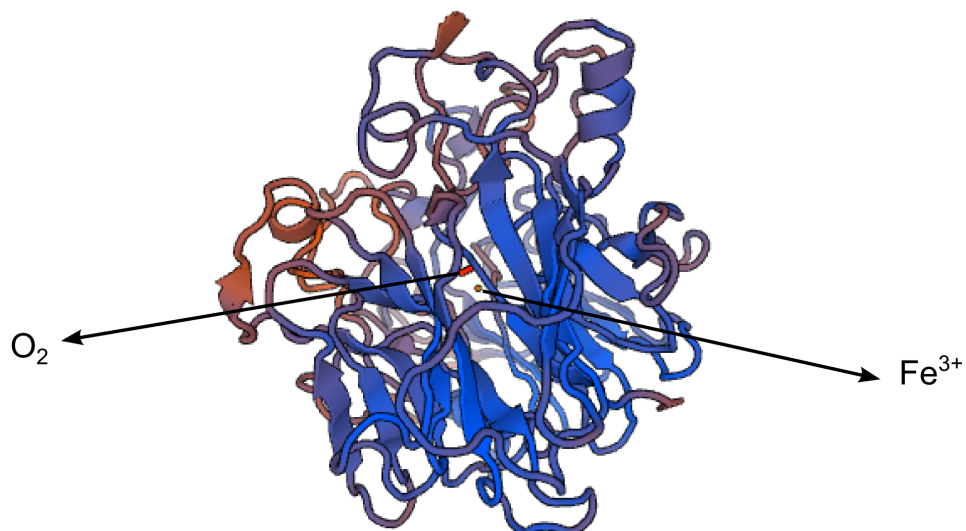

**Figure S3.** Model of Rzo using SWISS-MODEL (7-9).

**Table S1.** Strains isolated from peanut, identified by their 16S rDNA sequences using 8F and 1492R primers (10) and their closest relative.

| <b>Strain</b> | <b>Fragment length</b> | <b>Strain</b>                                               | <b>% Identity</b> |
|---------------|------------------------|-------------------------------------------------------------|-------------------|
| JS678         | 1400 bp                | <i>Acinetobacter</i> sp. DR1                                | 99 %              |
| JS679         | 1386 bp                | <i>Pseudomonas</i> sp. 130(2zx)                             | 99 %              |
| JS680         | 1381 bp                | <i>Pseudomonas putida</i> strain AS90                       | 98 %              |
| JS681         | 1391 bp                | <i>Pseudomonas syringae</i> pv. <i>phaseolicola</i> 1448A   | 98 %              |
| JS682         | 1387 bp                | <i>Pseudomonas syringae</i> pv. <i>aesculi</i> str. 0893_23 | 99 %              |
| JS683         | 1385 bp                | <i>Burkholderia cenocepacia</i> HI2424                      | 100 %             |

**Table S2.** Key genes encoding putative enzymes of the resveratrol degradation pathway in the JS678 genome. The sequences of JS678 were specified based on the contig numbers they were annotated in the draft genome (SUB1068911).

| Genes                                                   | Amino acid similarity to nearest homolog <sup>a</sup>                                                     | Contig | Primers used for RT-PCR                                  |
|---------------------------------------------------------|-----------------------------------------------------------------------------------------------------------|--------|----------------------------------------------------------|
| 16S rRNA gene                                           | 100 % to 16S rRNA from <i>Acinetobacter</i> sp. DR1 (CP002080.1)                                          | 401    | 5' GGTTGGCGCTAATATCTGGA 3' & 5' TCTGAATCAACGCTGTCTGG 3'  |
| Resveratrol oxygenase ( <i>rzo</i> )                    | 73 % to dioxygenase from <i>Marinomonas profundimaris</i> (WP_024022327.1)                                | 2366   | 5' GGGTGAAGGCCGTGTTAGTA 3' & 5' GATCCAATGCCCATGGTAAG 3'  |
| 4-Hydroxybenzaldehyde dehydrogenase ( <i>pchA</i> )     | 97 % to aldehyde dehydrogenase from <i>Acinetobacter baumannii</i> Naval-82 (WP_002123484.1)              | 2302   | 5' CTTGGAATTGGCCATTTGTT 3' & 5' GAACCTGCGGATGTTTCAGTT 3' |
| 4-Hydroxybenzoate hydroxylase ( <i>pobA</i> )           | 92 % to 4-hydroxybenzoate 3-monoxygenase from <i>Acinetobacter oleivorans</i> JCM 1667 (YP_003732665.1)   | 5608   | 5' TGAATTCCGAATAGCCGAAC 3' & 5' GGTTTAGAGGGGCAACTTCC 3'  |
| Protocatechuate 3,4-dioxygenase ( <i>pcd</i> )          | 85 % to protocatechuate 3,4-dioxygenase from <i>Acinetobacter calcoaceticus</i> ANC 3811 (WP_016137964.1) | 4965   | 5' GTGCTTACGCCCAACGTAAT 3' & 5' GGGCCAAACAAATTTGAAGA 3'  |
| 3,5-Dihydroxybenzaldehyde dehydrogenase ( <i>ken6</i> ) | 39 % to benzaldehyde dehydrogenase from <i>Streptomyces violaceoruber</i> (CAQ52616.1)                    | 1739   | 5' CCTTGCTTTAGCCAACCAAA 3' & 5' GAGATCCAGTGGTCGGTTGT 3'  |

<sup>a</sup> The similarity was compared using UniProt database

## References

1. **Brefort T, Scherzinger D, Carmen Limon M, Estrada AF, Trautmann D, Mengel C, Avalos J, Al-Babili S.** 2011. Cleavage of resveratrol in fungi: Characterization of the enzyme Rco1 from *Ustilago maydis*. *Fung. Genet. Biol.* **48**:132-143.
2. **Kamoda S, Saburi Y.** 1993. Structural and enzymatic comparison of lignostilbene-*alpha*, *beta*-dioxygenase isozymes, I, II, and III, from *Pseudomonas paucimobilis* TMY1009. *Biosci. Biotechnol. Biochem.* **57**:931-934.
3. **Kamoda S, Saburi Y.** 1993. Cloning, expression, and sequence analysis of a lignostilbene-*alpha*, *beta*-dioxygenase gene from *Pseudomonas paucimobilis* TMY 1009. *Biosci. Biotechnol. Biochem.* **57**:926-930.
4. **Marasco EK, Schmidt-Dannert C.** 2008. Identification of bacterial carotenoid cleavage dioxygenase homologues that cleave the interphenyl *alpha*,*beta* double bond of stilbene derivatives via a monooxygenase reaction. *Chem. Biochem.* **9**:1450-1461.
5. **Masai E, Katayama Y, Nishikawa S, Fukuda M.** 1999. Characterization of *Sphingomonas paucimobilis* SYK-6 genes involved in degradation of lignin-related compounds. *J. Ind. Microbiol. Biotechn.* **23**:364-373.
6. **Hoffmann J, Bóna - Lovász J, Beuttler H, Altenbuchner J.** 2012. In vivo and in vitro studies on the carotenoid cleavage oxygenases from *Sphingopyxis alaskensis* RB2256 and *Plesiocystis pacifica* SIR - 1 revealed their substrate specificities and non - retinal - forming cleavage activities. *FEBS Journal* **279**:3911-3924.

7. **Biasini M, Bienert S, Waterhouse A, Arnold K, Studer G, Schmidt T, Kiefer F, Cassarino TG, Bertoni M, Bordoli L, Schwede T.** 2014. SWISS-MODEL: modelling protein tertiary and quaternary structure using evolutionary information. . *Nucleic Acids Research* **42**:252-258.
8. **Arnold K, Bordoli L, Kopp J, Schwede T.** 2006. The SWISS-MODEL workspace: a web-based environment for protein structure homology modelling. *Bioinformatics* **22**:195-201.
9. **Benkert P, Biasini M, Schwede T.** 2011. Toward the estimation of the absolute quality of individual protein structure models. *Bioinformatics* **27**:343-350.
10. **Baker GC, Smith JJ, Cowan DA.** 2003. Review and reanalysis of domain specific 16S primers. *J. Microbiol. Methods* **55**:541-555.
